# Supplementary material
Source: publisher figshare collection journal article supplement (https://acs.figshare.com/ndownloader/files/12660335)
Supplement: Supplementary file 1 [file 12660335]

## **Supporting Information**

### **Ultrasonic and catalyst free epoxidation of limonene and other terpenes using dimethyl dioxirane in semi-batch conditions**

Luc Charbonneau, Xavier Foster, and Serge Kaliaguine \*

Department of Chemical Engineering, Laval University, 1065 de la Medecine Avenue,  
Quebec City, Quebec Canada, G1V 0A6

\*serge.kaliaguine@gch.ulaval.ca

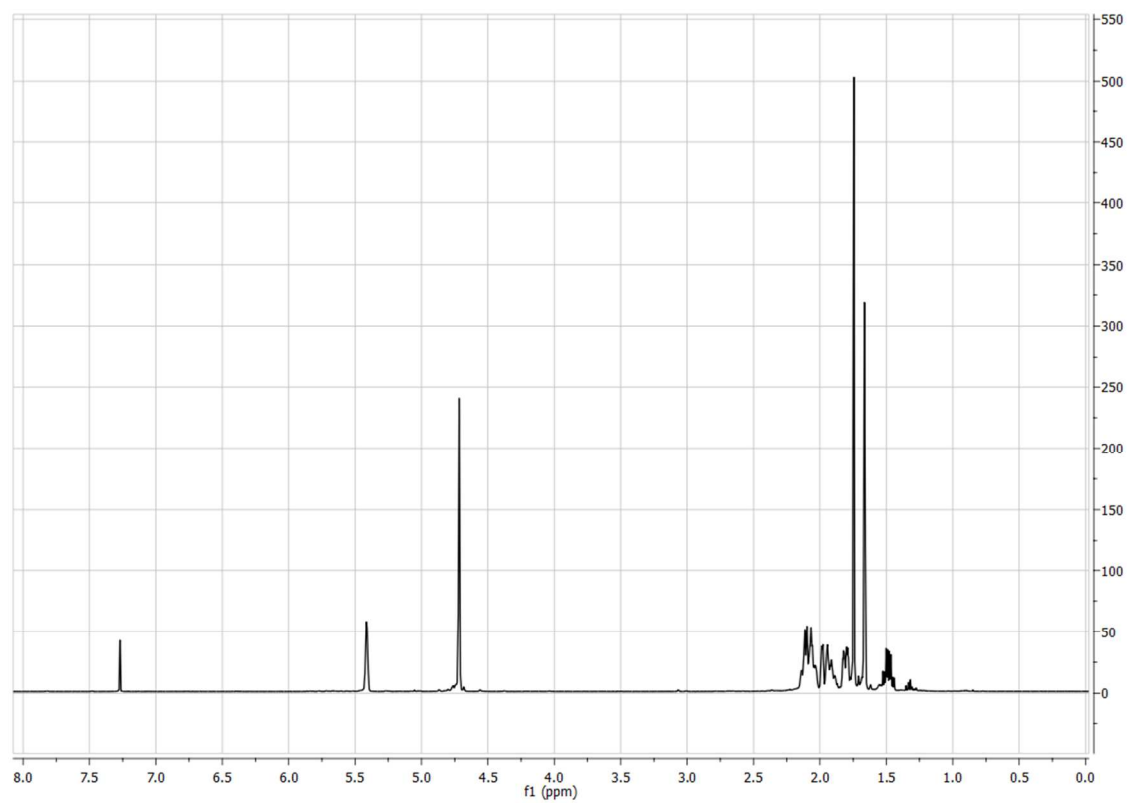

**Figure S1.**  $^1\text{H}$ -NMR Limonene

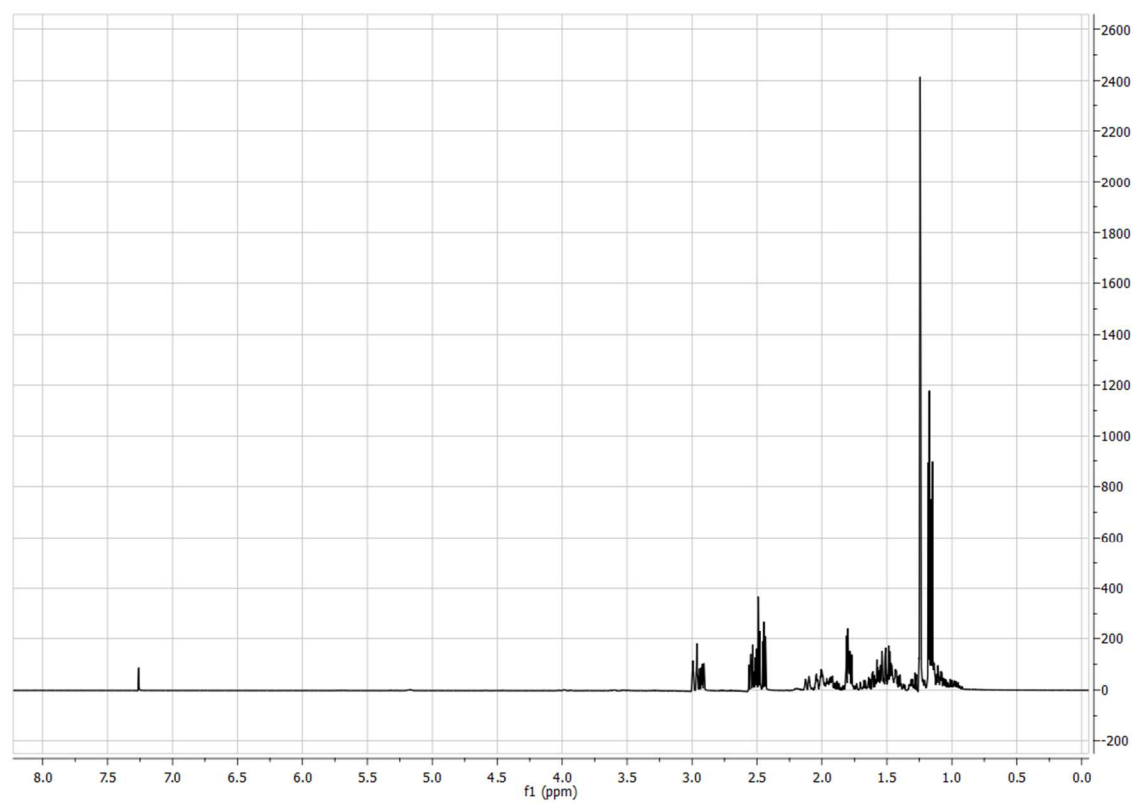

**Figure S2.**  $^1\text{H}$ -NMR of limonene dioxide

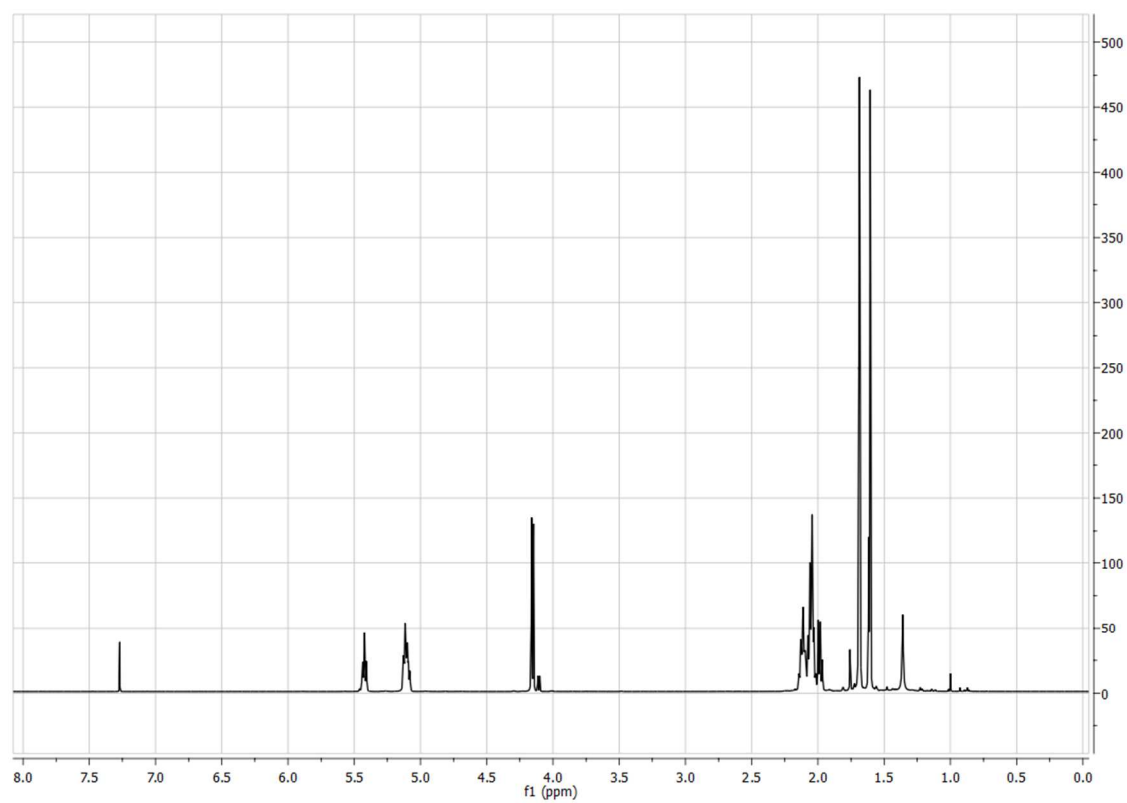

**Figure S3.**  $^1\text{H}$ -NMR of farnesol

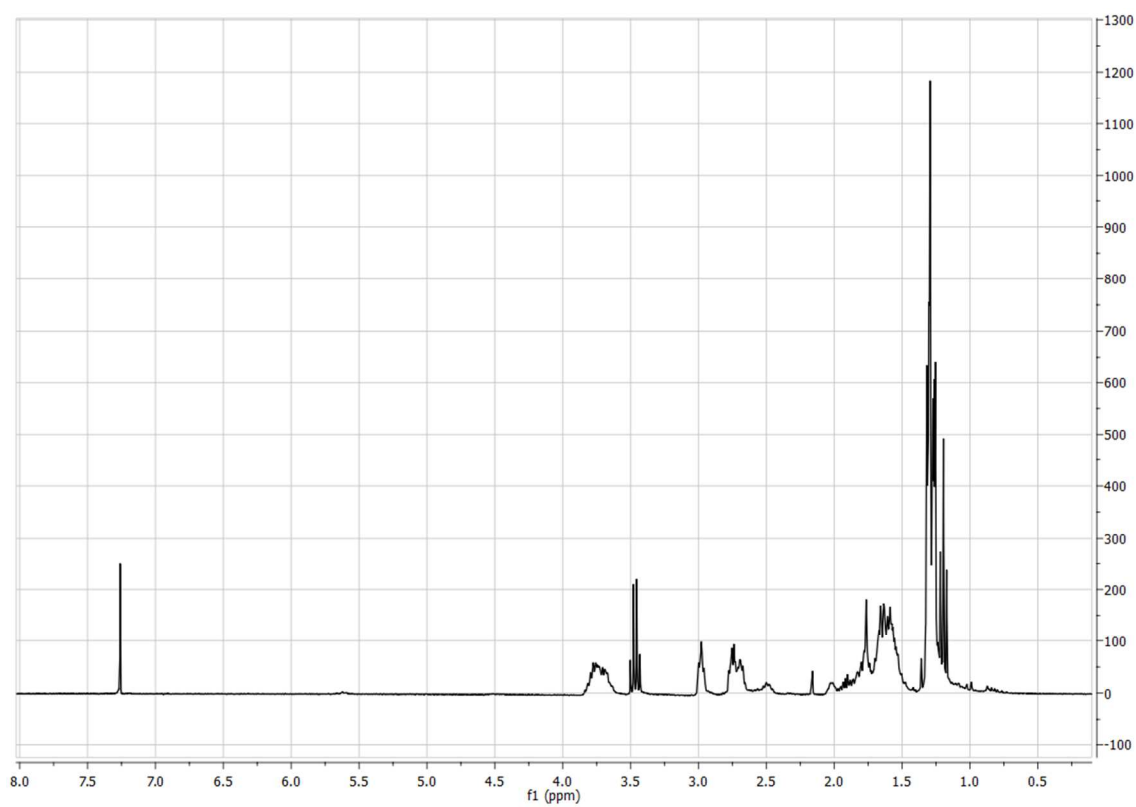

**Figure S4.**  $^1\text{H}$ -NMR of epoxifarnesol

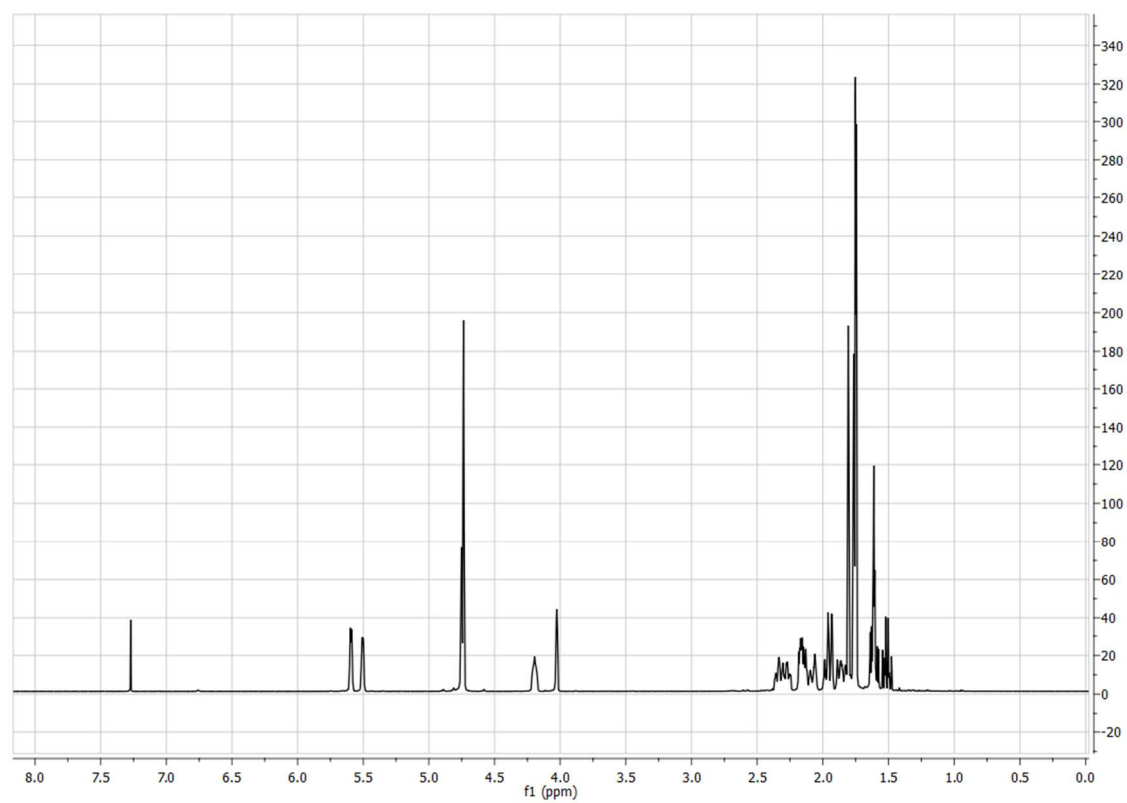

**Figure S5.**  $^1\text{H}$ -NMR of carveol

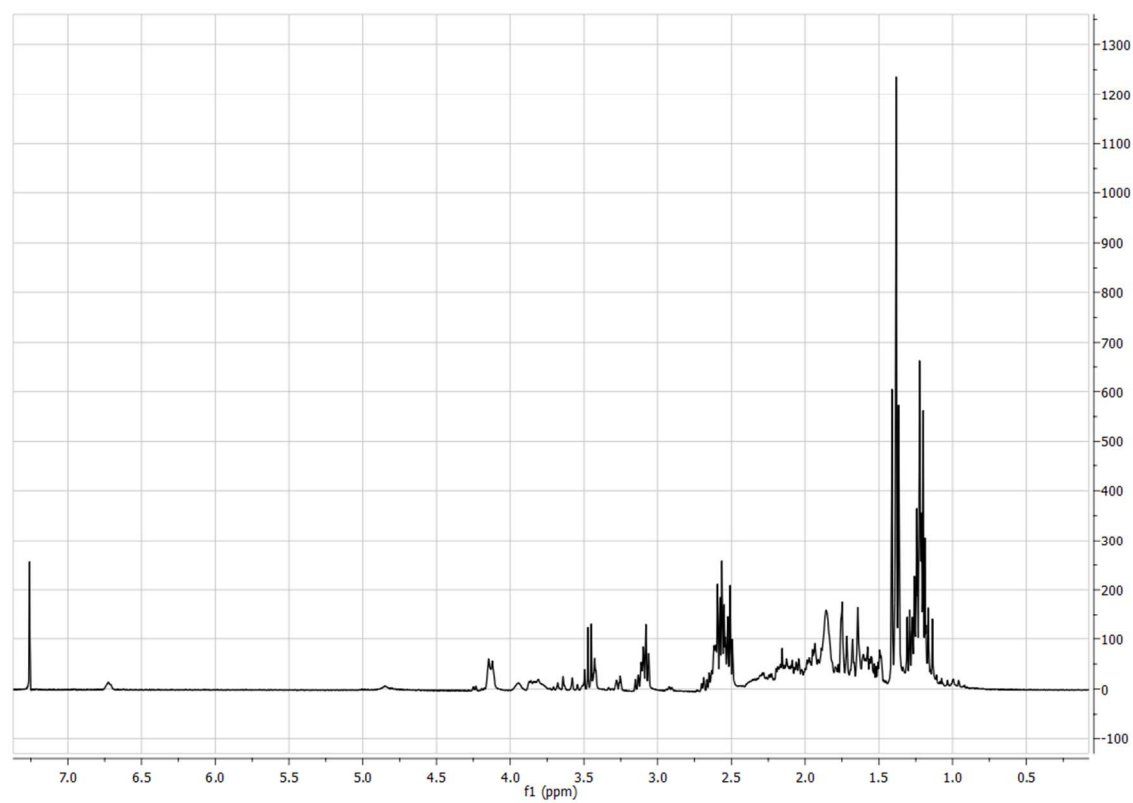

**Figure S6.**  $^1\text{H}$ -NMR of epoxicarveol

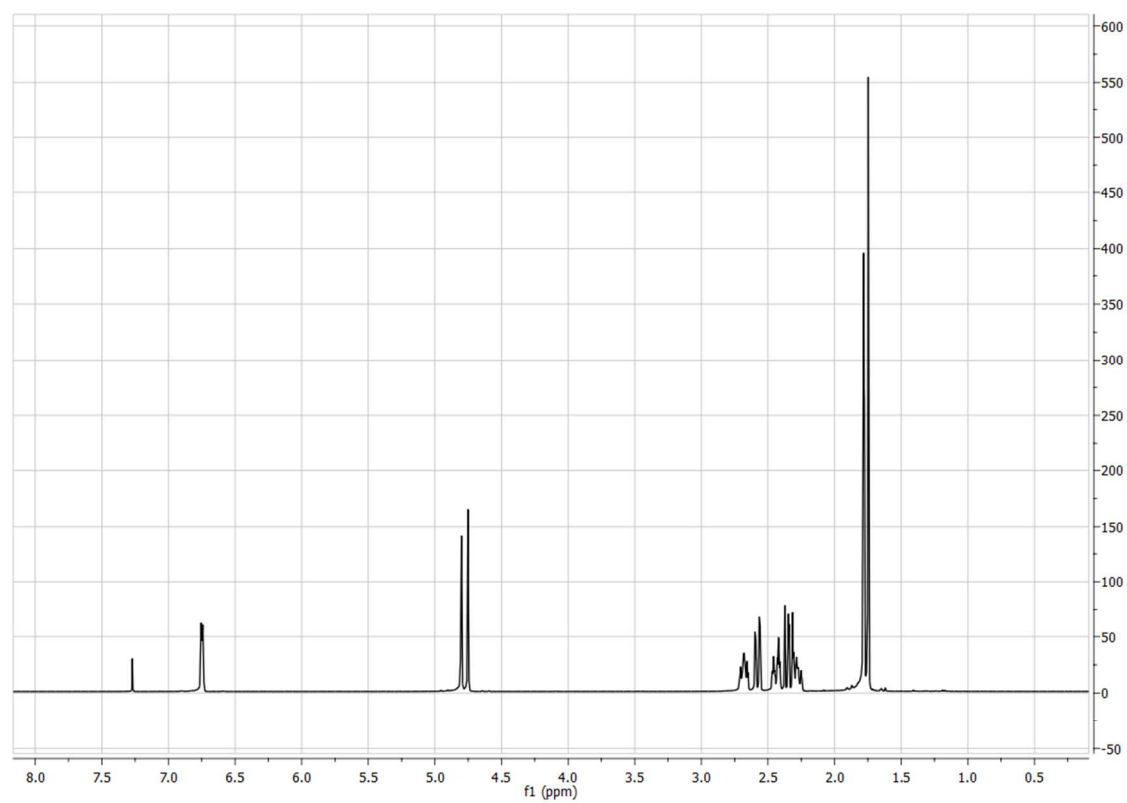

**Figure S7.**  $^1\text{H}$ -NMR of carvone



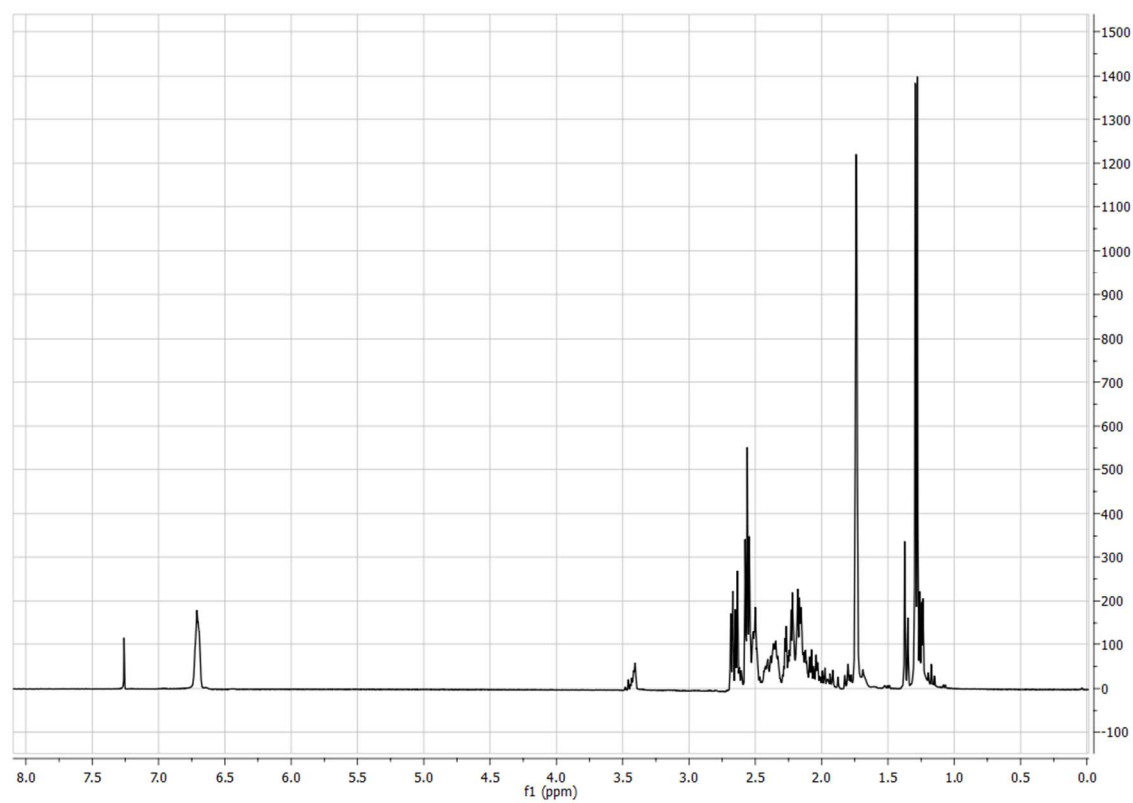

**Figure S8.**  $^1\text{H}$ -NMR of epoxycarvone
